# Supplementary material
Source: PubMed Central journal article supplement (PMC3988463)
Supplement: NIHMS57956-supplement-Sup.pdf [file NIHMS57956-supplement-Sup.pdf]

**A****FtsH**

MNRVFRNTIFYLLILLVIGVVSYFQTSNPKTENMSYSTFIKNLDDGKVDSVSVQP  
VRGVYEVKQQLKNYDKDQYFLTHVPEGKGADQIFNALKKTDVKVEPAQETSGWVTF  
 LTTIIPFVIIFILFFFLLNQAQGGGSRVMNFGKSKAKLYTEEKRVKFKDVAGADE  
 EKQELVEVVEFLKDPRKFAELGARIPKGVLLVGPPGTGKTLLAKACAGEAGVPPFS  
 ISGSDFVEMFVGVGASRVRDLFENAKKNAPCLIFIDEIDAVGRQRGAGLGGGHD  
 ER EOTLNQLLVEMDGFSANEGIIIIAATNRADILDPALLRPGRFDRQITVDRPDVIGR  
 EAVLKVHARNKPLDETIVNLKSIAMRTPGFSGADLENLLNEAALVAARQNKKKIDAR  
DIDEATDRVIAGPAKKSRVISKKERNIVAYHEGGHTVIGLVLDEADMVHKVTIVPR  
GOAGGYAVMLPREDRYFQTKPELLDKIVGLLGGRVAEEIIFGEVSTGAHNDFORAT  
NIARRMVTEFGMSEKLGPLQFGOSOGQVFLGRDFNNEQNYSDQIAYEIDOEIQRI  
IKECYERAKOILTENRDKLELIAOTLLKVETLDAEOIKHLIDHGTLPERNFSDDEK  
NDDVKVNILTKTEEKDDTKE

**B**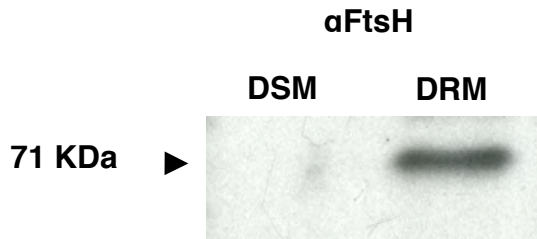

**Figure S1: Detection of FtsH in the DRM fraction by mass spectrometry and western blot analysis. (A)** Amino acid sequence of FtsH from *B. subtilis*. The oligopeptides from FtsH that were identified in the sample by mass spectrometry analysis are underlined. **(B)** Detection of FtsH by western blot analysis in of the DRM and DSM fraction using polyclonal antibodies against FtsH. The signal was only detected in the DRM fraction. Arrow indicates the molecular weight marker of 71 KDa.

**A**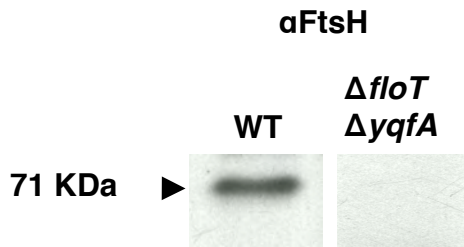**B**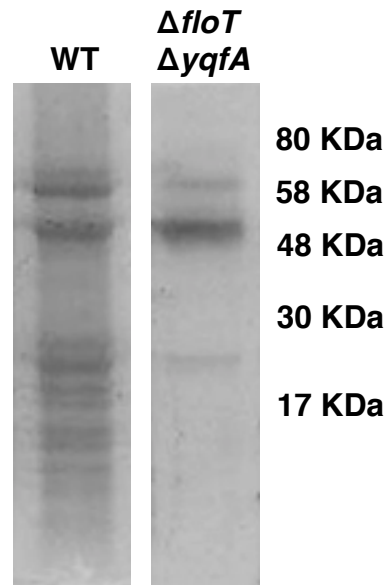

**Figure S2: Proteins associated to the DRM fraction decreased in the absence of the flotillin homologs. (A)** Western blot analysis using polyclonal antibodies against FtsH to detect the presence of FtsH in the DRM fraction of the wild type strain and the  $\Delta floT \Delta yqfA$  mutant. Signal was only detected in the DRM fraction of the wild type strain. The arrow indicates the molecular weight expected for FtsH protein. **(B)** SDS-PAGE showing the pool of proteins associated with the membrane fraction that is resistant to detergent solubilization (DRM). The panel shows samples from the wild type strain and in the double  $\Delta floT \Delta yqfA$  mutant. The protein pattern was analyzed by coomassie staining. Molecular weights are labeled on the right. The protein content of the DRM fractions decreases in the absence of the flotillin-like proteins FloT and YqfA.

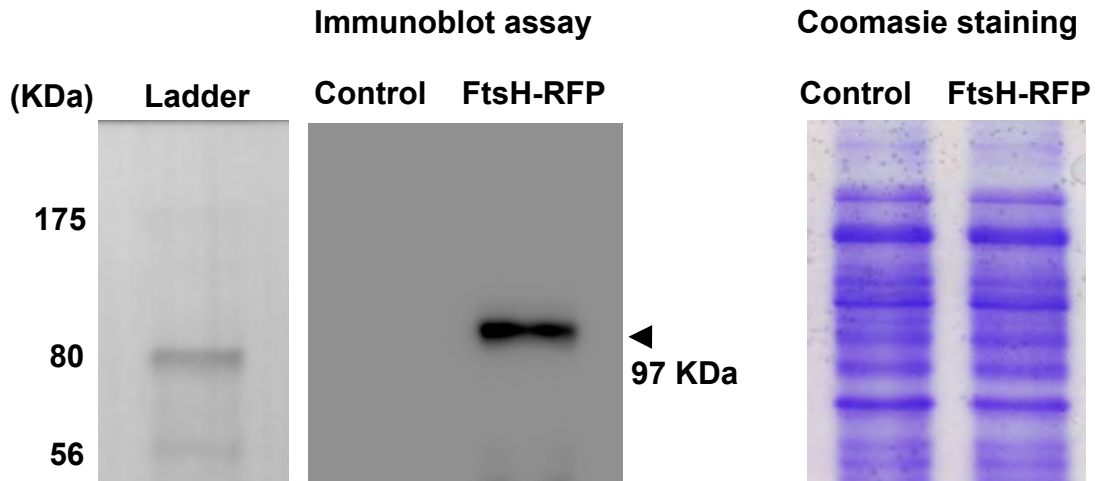

**Figure S3: FtsH-RFP is not subject to proteolytic cleavage.** Western blot analysis using polyclonal antibodies against RFP to detect the expression and the molecular weight of the translational fusion FtsH-RFP ( $MW_{FtsH} = 71 \text{ KDa} + MW_{RFP} = 26 \text{ KDa}$ ; Total 97 KDa). Negative control in the immunoblot assay is represented by wild-type cell extracts expressing no translational fusion (left lane). The right lane shows the immunoblot analysis extracts from the  $\Delta ftsH \text{ lacA}::P_{hp}\text{-FtsH-RFP}$  strain. The arrow indicates the molecular weight expected for FtsH protein. Coomassie staining of the SDS-PAGE is shown on the right for analysis of the protein content of the cell extracts.

**A**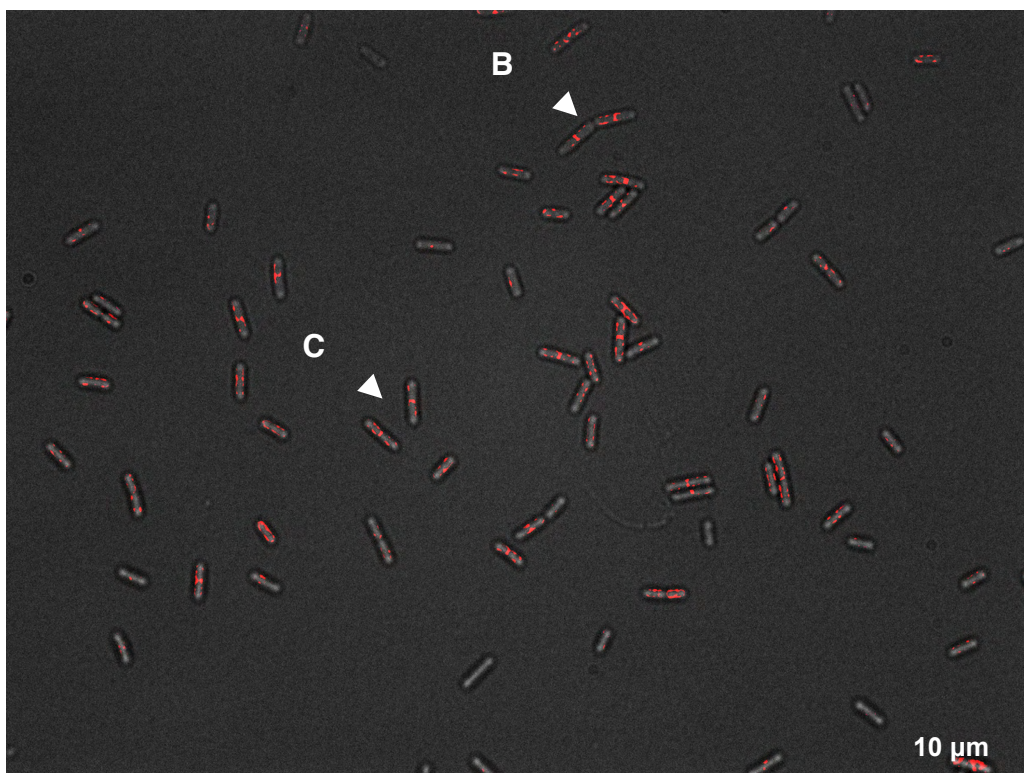**B**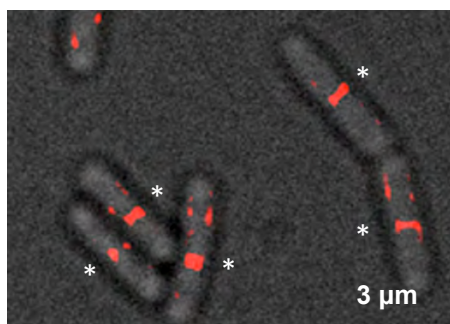**C**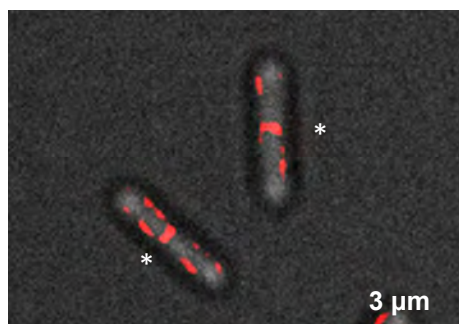

**Figure S4: Subcellular localization of the protease FtsH using the translational fusion FtsH-RFP.** Fluorescence micrographs of a field of exponentially growing cells labeled with the translational fusion FtsH-RFP (false colored in red). The fluorescence signal shows high concentration in the midcell and lower concentration in certain foci across the cellular membrane. Cells were grown in liquid shaking MSgg at 30°C and cells were harvested in the middle of the exponential phase (approx. 8h of incubation). Arrows indicate detailed fields that are magnified in panels B and C. Asterisks in panels B and C show the midcell position of the signal FtsH-RFP in some cells. The expression of FtsH-RFP was controlled by an IPTG-inducible promoter (induction with 1mM IPTG).

**Figure S4**

**A**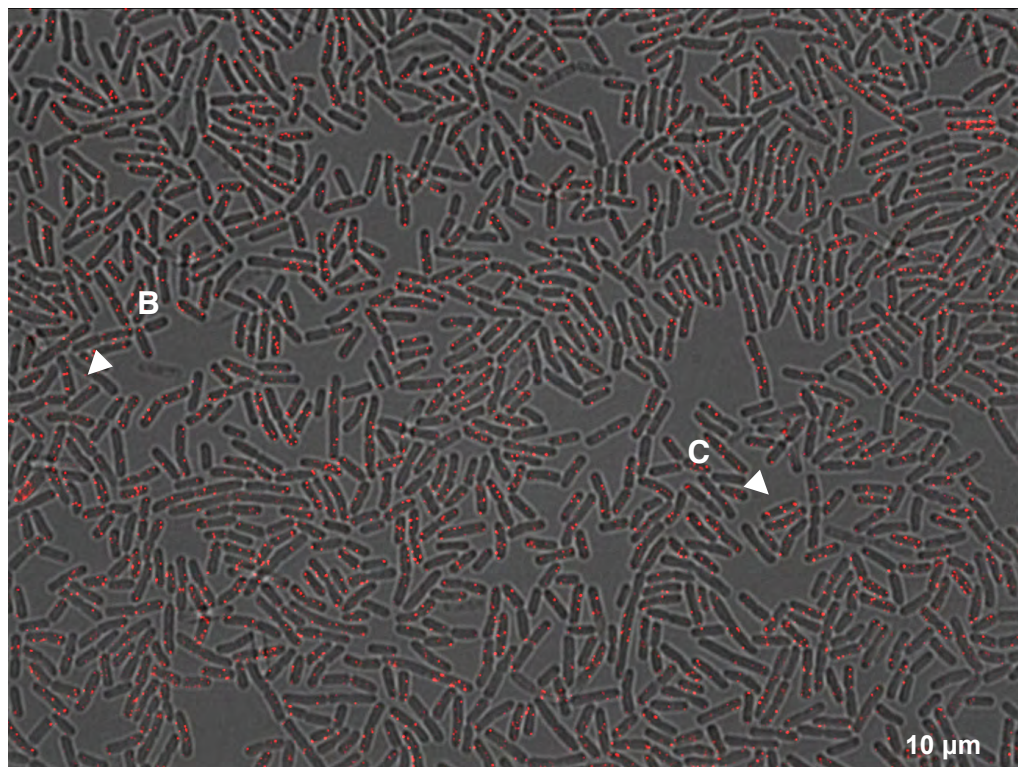**B**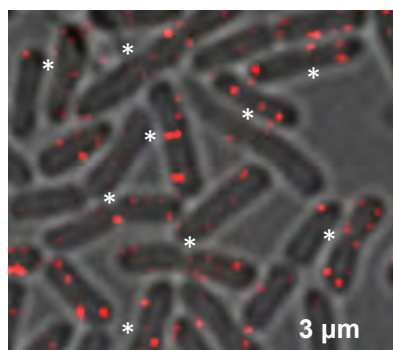**C**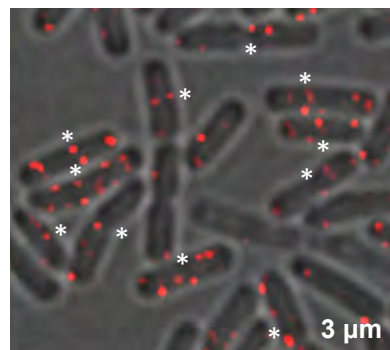

**Figure S5: Subcellular localization of the flotillin-like protein FloT using the translational fusion FloT-YFP.** Fluorescence micrographs of a field of exponentially growing cells labeled with the translational fusion FloT-YFP (false colored in red). The fluorescence signal shows the typical distribution in foci across the cellular membrane with a high concentration in the midcell. Cells were grown in liquid shaking MSgg at 30°C and cells were harvested in the middle of the exponential phase (approx. 8h of incubation). Arrows indicate detailed fields that are magnified in panels B and C. Asterisks in panels B and C show the midcell position of the signal FloT-YFP in cells.

**Figure S5**

**A**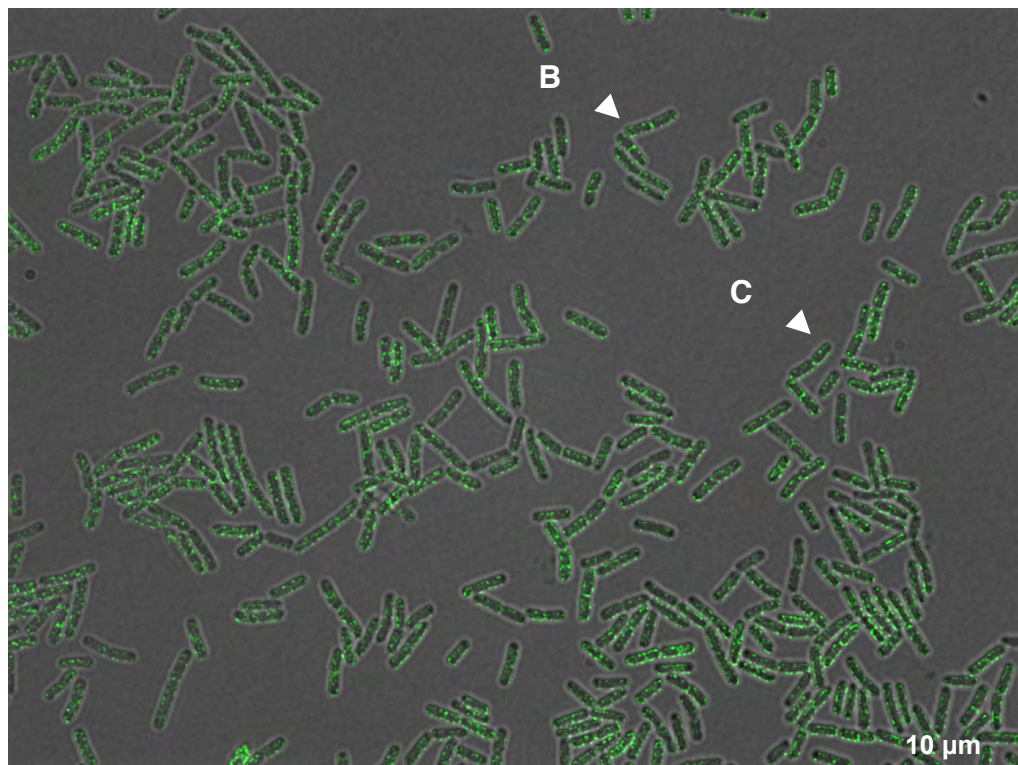**B**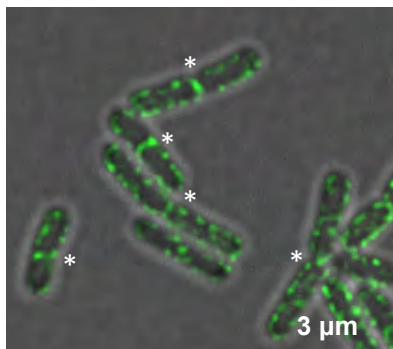**C**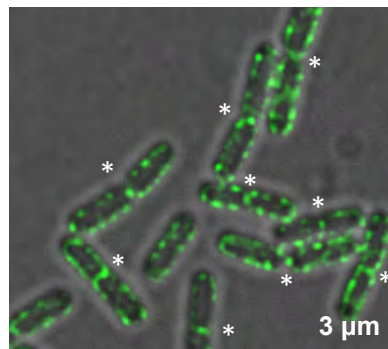

**Figure S6: Subcellular localization of the flotillin-like protein YqfA using the translational fusion YqfA-GFP.** Fluorescence micrographs of a field of exponentially growing cells labeled with the translational fusion YqfA-GFP (false colored in green). The fluorescence signal shows the typical distribution in foci across the cellular membrane with a high concentration in the midcell. Cells were grown in liquid shaking MSgg at 30°C and cells were harvested in the middle of the exponential phase (approx. 8h of incubation). Arrows indicate detailed fields that are magnified in panels B and C. Asterisks in panels B and C show the midcell position of the signal YqfA-GFP in cells.

**Figure S6**

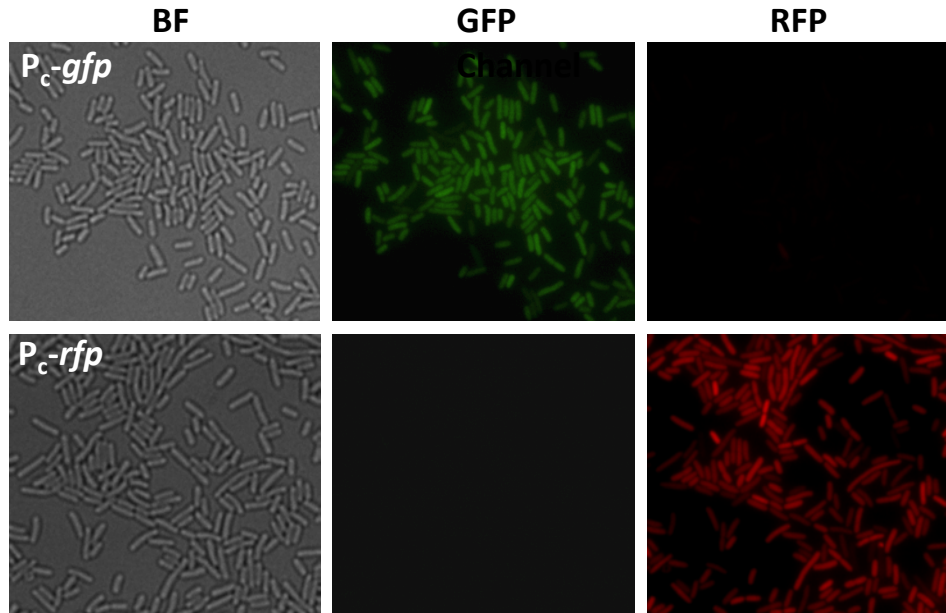

**Figure S7: There is no interference between the green and red fluorescence signal.** Fluorescence micrographs and transmitted light images of *E. coli* strains grown in liquid shaking LB at 37°C for 24h. The strains expressed GFP (upper row) or RFP (bottom row) under the control of a constitutive promoter (P<sub>c</sub>). scale bar is 5 μm. Fluorescence signal detected in the green and red channel are presented in GFP and RFP labeled columns, respectively. Transmitted light images are presented in the column labeled as BF.

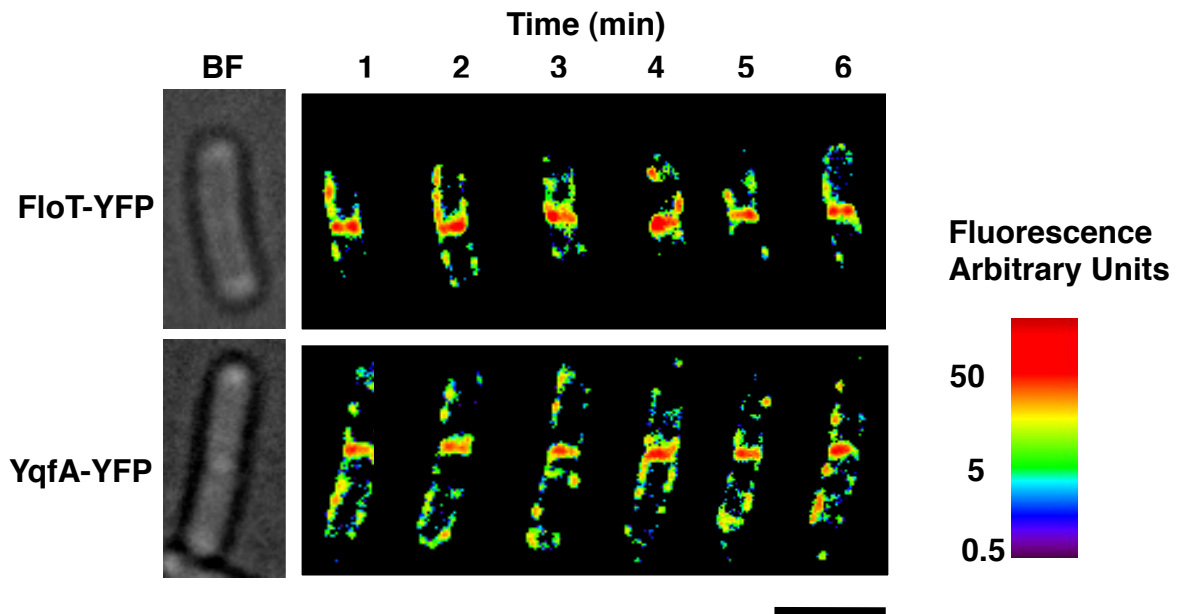

**Figure S8: Flotillins are permanently present at the midcell.** Time-lapse fluorescence analysis of the distribution pattern of FloT-YFP and YqfA-GFP foci. Cells were grown in liquid shaking MSgg at 30°C for 8h. Exponentially growing cells were mounted on agarose-coated slides. The upper row shows the distribution of the FloT-YFP foci within the same cell for 6 min. The bottom row shows the distribution of the YqfA-GFP foci within the same cell for 6 min. This figure corresponds to figure 7 of the body of the paper. Fluorescence signal is quantified in relation to the background fluorescence using a color spectrum logarithmic scale, in which higher intensity of the fluorescence signal is represented in red tones (scale is presented on the right). Scale bar is 2  $\mu$ m.



## FloT-YFP

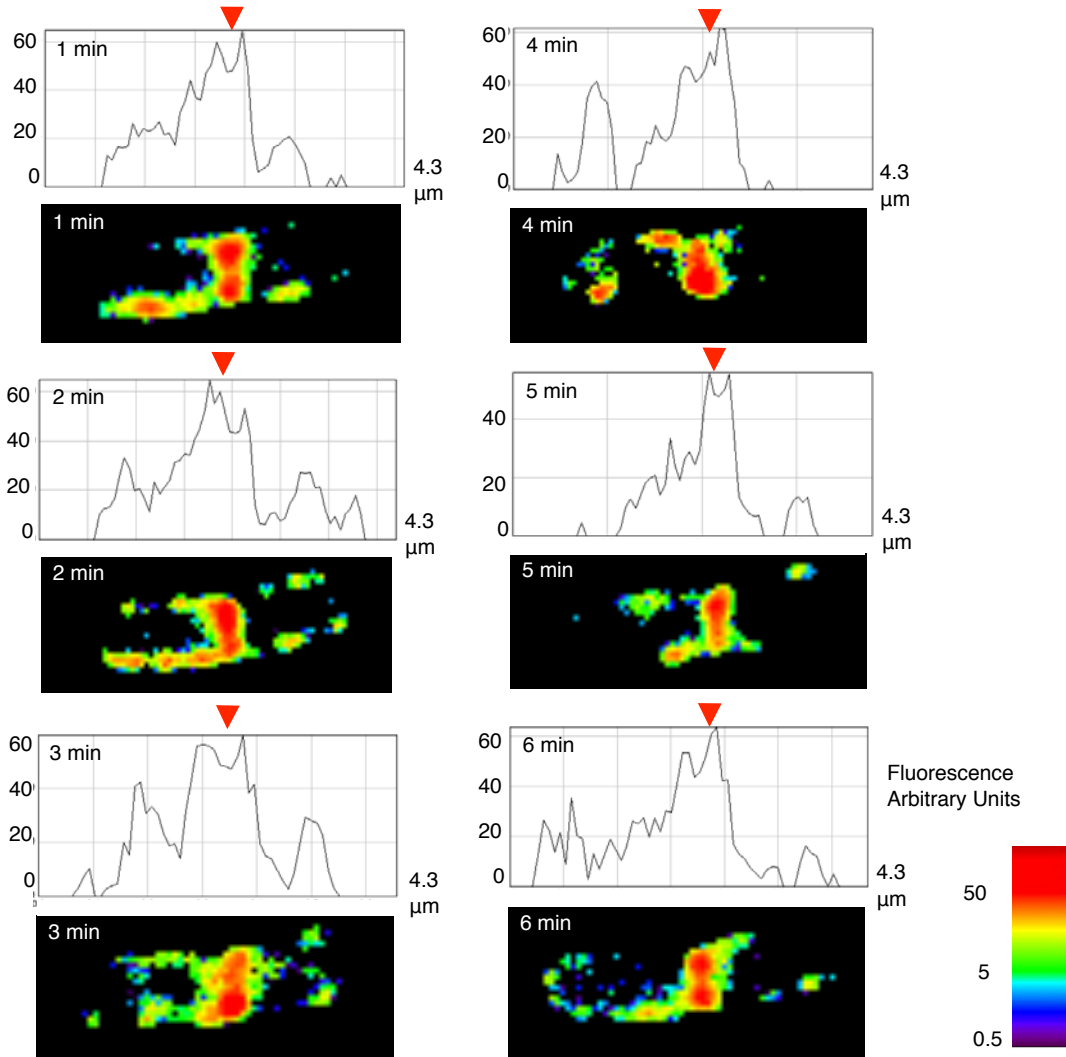

**Figure S9: Quantification of relative fluorescence intensity detected in the time-lapse fluorescence analysis of FloT-YFP.** Time-lapse fluorescence analysis of the distribution pattern of FloT-YFP foci for a time period of 6 min. Each panel shows a detailed micrograph of the distribution of the FloT-YFP foci within the same cell at every point (in min). Fluorescence signal is quantified in relation to the background fluorescence, using a color spectrum logarithmic scale (spectrum scale is presented on the right). The relative fluorescence intensity values of each micrograph is represented in a graph (above each micrograph). X-axis represents the cell length and y-axis represents the value of relative fluorescence intensity detected. The midcell is marked with a red arrow. Scale bar is 1 μm.

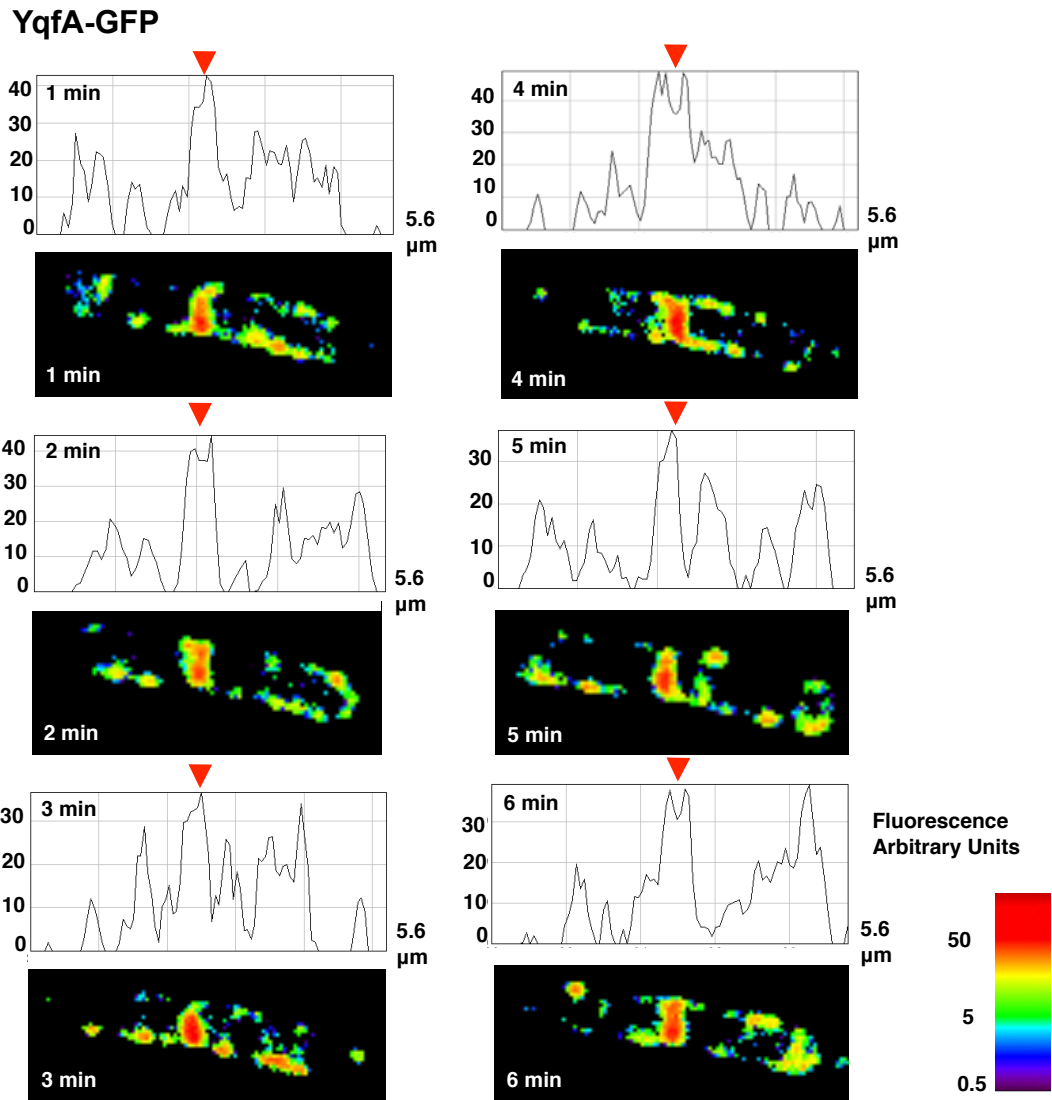

**Figure S10: Quantification of relative fluorescence intensity detected in the time-lapse fluorescence analysis of YqfA-GFP.** Time-lapse fluorescence analysis of the distribution pattern of YqfA-GFP foci for a time period of 6 min. Each panel shows a detailed micrograph of the distribution of the YqfA-GFP foci within the same cell at every point (in min). Fluorescence signal is quantified in relation to the background fluorescence, using a color spectrum logarithmic scale (spectrum scale is presented on the right). The relative fluorescence intensity values of each micrograph is represented in a graph (above each micrograph). X-axis represents the cell length and y-axis represents the value of relative fluorescence intensity detected. The midcell is marked with a red arrow. Scale bar is 1  $\mu\text{m}$ .

**Figure S10**

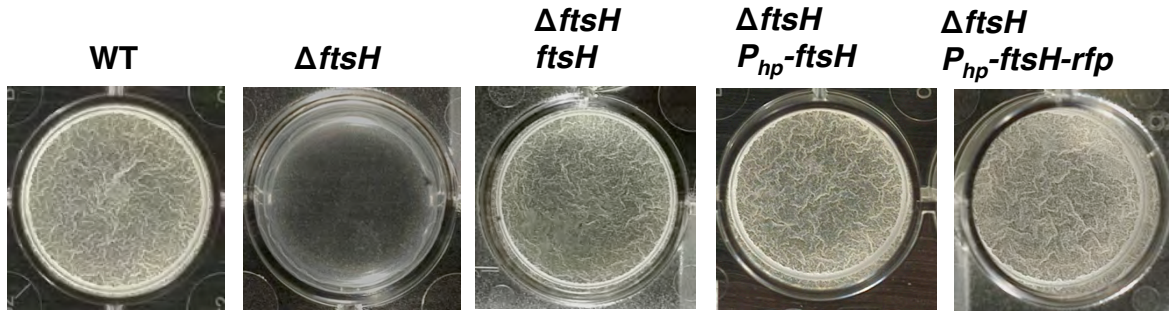

**Figure S11: Complementation of the  $\Delta ftsH$  mutant with a wild-type copy of *ftsH* restored biofilm formation.** Pellicle formation assay of different strains of *B. subtilis*. Pictures show a top view of the pellicles formed on the surface of MSgg liquid cultures incubated in 24-well plates at 30°C for 24h. Positive control is represented by the wild-type strain (WT) (left panel).  $\Delta ftsH$  mutant shows no pellicle formation (second panel). Complementation of  $\Delta ftsH$  mutant with a copy of *ftsH* induced by its own promoter partially restored biofilm formation (third panel). Complementation of  $\Delta ftsH$  mutant with an IPTG-inducible copy of *ftsH* restored wild-type levels of biofilm formation. Similar results were obtained when the  $\Delta ftsH$  mutant was complemented with the translational fusion FtsH-RFP (right panel). IPTG was added to a final concentration of 1mM.

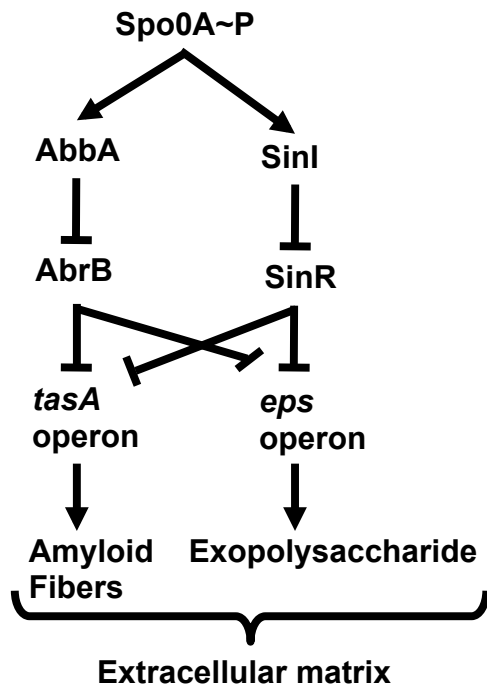

**Figure S12: Flow scheme of the regulatory circuit involved in extracellular matrix production.** Arrows indicate activation of transcription and T bars indicate repression. *AbrB* and *SinR* are two regulatory repressors that independently repress the genes required for the production of amyloid fibers and exopolysaccharide production. Both exopolysaccharide and amyloid fibers are important constituents of the extracellular matrix of the biofilm. Repression of *AbrB* and *SinR* expression is driven by the activation of the master regulator *Spo0A~P*.

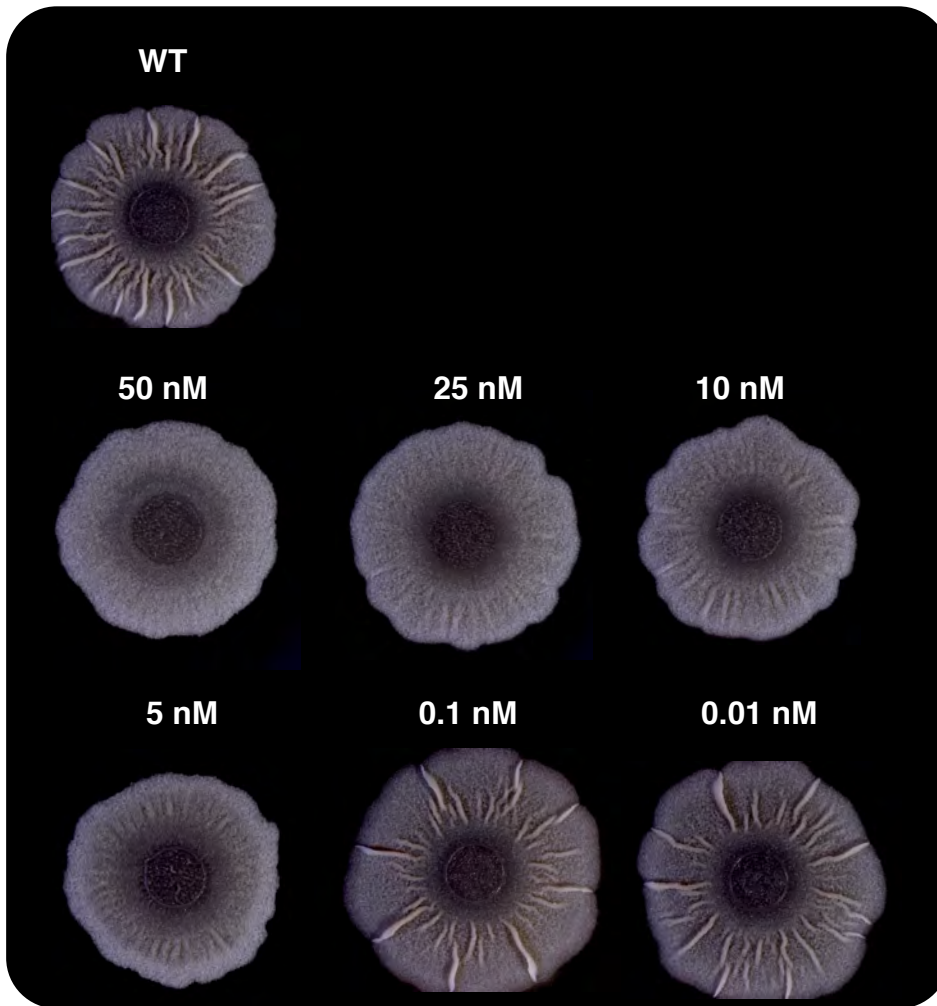

**Figure S13: Colony morphology assay of *B. subtilis* NCIB3610 in the presence of a range of concentrations of the SpoVM protein.** The ability of *B. subtilis* 3610 to make biofilm in solid MSgg agar can be correlated to the amount of wrinkles that are present in the surface of the colony. Addition of small concentrations of SpoVM inhibited the formation of wrinkles, which is indicative of an inhibition of biofilm formation. Gradual decrease of the concentration of SpoVM restored the formation of wrinkles in the colonies of *B. subtilis*. Colonies were incubated in MSgg agar at at 30°C for 72h.

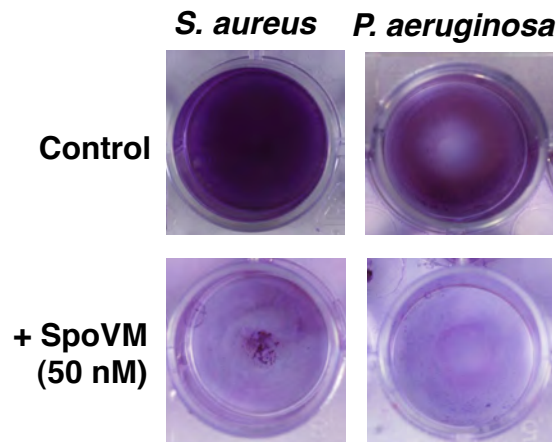

**Figure S14: SpoVM inhibits biofilm formation.** Biofilm formation assay of *S. aureus* SC-01 and *P. aeruginosa* PA14. 1ml of the culture was dispensed in polystyrene well plates and incubated overnight at 37° C. Biofilms were stained with crystal violet for better visualization. Addition of 50 nM of the peptide SpoVM inhibited the ability of both strains to form biofilm attached to the bottom of the well, evidenced by the absence of crystal violet dye after staining.

**Table S1: Proteins associated with the DRM fraction in *B. subtilis***

| <b>Protein</b> | <b>Function</b>                       | <b>Functional Category</b>  |
|----------------|---------------------------------------|-----------------------------|
| FtsH           | Metalloprotease                       | Cell shape                  |
| MreBH          | Actin-like protein                    |                             |
| MreC           | Actin-associated protein              |                             |
| EzrA           | Tubulin-associated protein            |                             |
| OppA           | Oligopeptide ABC transporter          | Quorum sensing              |
| PrsA           | Protease secretion chaperone.         | Protease secretion          |
| FeuA           | Iron-uptake system (binding protein)  | Iron uptake                 |
| FeuB           | Iron-uptake system (membrane protein) |                             |
| PbpC           | Penicillin-binding protein 3          | Penicillin-binding proteins |
| DacA           | Penicillin-binding protein 5          |                             |
| DacC           | Penicillin-binding protein            |                             |
| YxeB           | Unknown. Similar to ABC transporter   | Unknown                     |
| YwjA           | Unknown. Similar to ABC transporter   |                             |
| YknZ           | Unknown. Similar to ABC transporter   |                             |
| YwbM           | Unknown                               |                             |
| YcdA           | Unknown                               |                             |
| YerH           | Unknown                               |                             |
| YufN           | Unknown                               |                             |
| AdcA           | Lipoprotein                           |                             |
| BdbD           | Thiol-disulfide oxidoreductase        | Protein folding             |
| Qox2           | Quinol oxidase                        | Redox enzyme                |
| YxeM           | ABC transporter                       | Transporter                 |
| RbsB           | ABC transporter                       | Transporter                 |
| YkwC           | Unknown                               | Unknown                     |
| YeeF           | Unknown                               |                             |
| YpuA           | Unknown                               |                             |

**Table S1 (continuation): Proteins associated with the DRM fraction in *B. subtilis***

Amino acid sequence of the proteins listed in table S1. The oligopeptides that were identified in the samples by mass spectrometry analysis are underlined. The percentage coverage value obtained for each protein is shown in parenthesis.

**FtsH (38.93 %)**

MNRVFRNTIFYLLILLVVIIGVVSFYQTSNPKTENMSYSTFIK<sup>1</sup>NLDDGKVDSVSVQPV<sup>2</sup>RGVYEVK<sup>3</sup>Q<sup>4</sup>LK<sup>5</sup>NYD  
KDQYFLTHVPEGK<sup>6</sup>GADQIFNALK<sup>7</sup>KTDV<sup>8</sup>KVEPAQETS<sup>9</sup>GWVTF<sup>10</sup>LT<sup>11</sup>TIIPF<sup>12</sup>VIIFFIL<sup>13</sup>FFLLNQAQGG<sup>14</sup>SRVMN  
FGKSKAKLYTEEK<sup>15</sup>KRVK<sup>16</sup>FKDVAGADEEK<sup>17</sup>QELVEVVEFLK<sup>18</sup>DPRKFAELGARI<sup>19</sup>PKGVLLV<sup>20</sup>GPPGTG<sup>21</sup>K<sup>22</sup>TLLAKA  
CAGEAGV<sup>23</sup>PF<sup>24</sup>FSISGSD<sup>25</sup>FVEMFV<sup>26</sup>GVGASRVRDLFENAKKNAPCLIFIDEIDA<sup>27</sup>VGRQ<sup>28</sup>RGAGLGGGH<sup>29</sup>DEREQ<sup>30</sup>TL  
NQLLVEMDGFSANEGIIIIAATNRADILD<sup>31</sup>PALLR<sup>32</sup>PGRFDRQITVDRPDVIGREAVLKVHARNK<sup>33</sup>PLDE<sup>34</sup>TVNL  
KSIAMRT<sup>35</sup>PGFSGADLENLLNEAALVAARQ<sup>36</sup>NKKKIDARDIDEATDRVIAGPAK<sup>37</sup>SRVISK<sup>38</sup>KERNIVAYHEGG  
HTVIGLVLDEADMVHKVTIVPRGQAGGYAVMLPREDRYFQTKPEL<sup>39</sup>LDKIVGLLG<sup>40</sup>GRVAEEIIFGEVSTGAH  
NDFQRATNIARRMVTEFGMSEKLG<sup>41</sup>PLQFGQSOGGQVFLGRDFNNEQ<sup>42</sup>NYSDQIAYEIDQEIQRIIKECYERA  
KQILTENRDKLELIAQ<sup>43</sup>TLLKVETLDAEQIKHLIDHGTLPERNFSDDEK<sup>44</sup>NDDV<sup>45</sup>KNILTKTEEK<sup>46</sup>DDTKE

**MreBH (48.06 %)**

MFQSTEIGIDLGTANILVYSKNKGIILNEPSVAVD<sup>1</sup>TTT<sup>2</sup>KAVLAIGADAKNMI<sup>3</sup>GKTPGKIVAVRPMKDGVI  
ADYDMTTDL<sup>4</sup>LKHIMKKA<sup>5</sup>AKSIGMSFRKPNVVVCTPSG<sup>6</sup>STAVERRAISDAVK<sup>7</sup>NCGAKNVHLIEEPVAAAIGA  
DLPVDEPVANVVVDIGGGTTEVAIIISFGG<sup>8</sup>VVSCHSIRIGGDQLDE<sup>9</sup>IVS<sup>10</sup>FVRK<sup>11</sup>KYNLLIGERTAEQVKMEI  
GHALIEHIPEAMEIRGRDLVTGLPKT<sup>12</sup>IMLQ<sup>13</sup>SNEIQDAMRESLLHILEAIRATLEDC<sup>14</sup>PPELSGDIVDRGVIL  
TGGGALLNGIKEWLTEEIVVPVHVAQNPLESVAIGTGRSLEVIDKLQKAIK

**MreC (52.41 %)**

MPNKRMLLLLLLCIIILVAMIGFSLKGG<sup>1</sup>RNTT<sup>2</sup>WPEKVI<sup>3</sup>GD<sup>4</sup>TTGVFQNI<sup>5</sup>FHTPAEFFAGIFENINDL<sup>6</sup>KNTYKE  
NERLREKLDGQTQYEAKLQELEENKSLRDELGHVKS<sup>7</sup>IKDYKPI<sup>8</sup>LATVIARSPDNWAKQVTINKGTQONVA  
FDMAVTNEKGALIGKIKSSGLNNFTSAVQ<sup>9</sup>LLSDPDRNNRVATKISGK<sup>10</sup>KGSKGYGLIEGYDKEK<sup>11</sup>R<sup>12</sup>LKMTII  
ERKDKQDVKKGDLIETS<sup>13</sup>GTGGVFPEGLTIGE<sup>14</sup>VTDIESDSYGLTKVAYVKPAADL<sup>15</sup>DLNNVIVN<sup>16</sup>RDVPTVD  
TEEEGS

**EzrA (52.85 %)**

MEFVIGLLIVLLALFAAGYFFRKKIYAEIDRLE<sup>1</sup>SWKIEILNRSIVEEMSKIKHLKMTGQTEEFFEK<sup>2</sup>WREEW  
DEIVTAHMPKVEELLYDAEENADKYRFK<sup>3</sup>KANQVLVHID<sup>4</sup>LLTAAESSIEKILREISDLVTSEEKSREEIEQ  
VRERYSKSRKNLLAYSHLYGELYDSLEKDLDEI<sup>5</sup>WSGIKQFEEETE<sup>6</sup>GGNYITARKV<sup>7</sup>LLEQDRNLERLQSYID  
DVPKLLADCKQTPVPGQIAKLK<sup>8</sup>DGYGEMKEKGYKLEHIQLDKELENLSNQLKRAEHVLMTEL<sup>9</sup>DI<sup>10</sup>DEASAILQ  
LIDENIQSVYQQL<sup>11</sup>EGEVEAGQSVLSKMP<sup>12</sup>ELIAYDKLKEEKEHTKAETELVKESYRLTAGELGKQQA<sup>13</sup>FEKR  
LDEIGKLLSSVKDKLDAEHVAYSLLVEEVASIEKQIEEVK<sup>14</sup>KEHA<sup>15</sup>EYRENLQALRKEELQARET<sup>16</sup>LSNLK<sup>17</sup>KTI  
SETARLLKTSNIPGIPSHIQEML<sup>18</sup>ENAH<sup>19</sup>HHIQETVNQLNELPLNMEEAG<sup>20</sup>AHLKQAE<sup>21</sup>DIVNRASRESEELVEQ  
VILIEKIIQFGNFRFRSQNHILSEQLKEAERRFYAFDYDDSYEIAAAAVEKAAPGAVEKIKADISA

**OppA (59.63 %)**

MKKRWSIVTLMLIFTLVLSACGFGGSGSNGEGK<sup>1</sup>KDSK<sup>2</sup>GK<sup>3</sup>TTLNINIKTEPFSLHPGLANDSVSGGVIRQTF  
EGLTRINADGEPEEGMASKIETS<sup>4</sup>KDGKTYTFTIR<sup>5</sup>DGVKWSNGDPVTAQDFEYAWK<sup>6</sup>WALDPN<sup>7</sup>NESQYAYQLY  
YIKGAEAAANTGKGS<sup>8</sup>LDDVAVKAVNDKTLKVELNNPTPYFTELTA<sup>9</sup>FYTYMPINKKIAEK<sup>10</sup>NKKWNTNAGDDYV  
SNGP<sup>11</sup>FKMTAWKHSGSITLEKNDQYWDKDKV<sup>12</sup>KLKKIDMVMINNNNTELK<sup>13</sup>KFQAGELDWAGMPLGQLPTESLP  
TLKKDGSLHVEPIAGVYWKFNTEAKPLDNV<sup>14</sup>NIRKALTYSLDRQSIVKNVTQGEQIPAMA<sup>15</sup>AVPPTMKGFED  
NKEGYFKDNDVKTAK<sup>16</sup>EYLEKGLKEMGLSKASDLPKIKLSYNTDDAHAKIAQAVQEMW<sup>17</sup>KNLGV<sup>18</sup>DVELDNSE  
WNVYIDKLSQDYQIGRMGWLGFNDPINFLELFRDKNGG<sup>19</sup>NNDTGWENPEFKKLLNQSQTETDKTKRAELL  
KKAEGIFIDEMPVAPIYFYTD<sup>20</sup>TWQDENLKG<sup>21</sup>VIMP<sup>22</sup>GTGEVYFRNAYFK



**PrsA (72.60 %)**

MKKIAIAAITATSILALSACSSGDKEVI AKTDAGDVTKGELYTNMKKTAGASVLTQLVQEKVLDKYYKVS  
DKYKVS  
KEIDNKLKEYKTQLGDQYTALEKQYGKDYLKEQVKYELLTQKA AKDN IKVTDADIKEYWEGLKGKIRASHI  
LVADKKTAEVEKLLKKGEKFEDLAKEYSTDS SASKGGDLGWFAKEGQMDETF SKAAFKLKTGEVSDPVKT  
QYGYHI IKKTEERGGKYDDMKKELKSEVLEQKLNDAAVQEA VQKVMKKADIEVKDKDLKDTFNTSSTSNT  
SSSSNSK

**FeuA (61.51 %)**

MKKISLTLILLALLALTAACGSKNESTASKASGTASEKKIEYLDKTYEVTVPTDKIAITGSVESMEDAKL  
LDVHPQGAISFSGKFPDMFKDITDKA EPTGKMEPNIEKILEMKPDVILASTKFPEKTLQKISTAGTTIPV  
SHISSNWKENMMLLAQLTGKEKKAKKI IADYEQDLKEIKTKINDKAKDSKALVIRIROGNIYIYPEQVYFN  
STLYGDLGLKAPNEVKAQAQELSSLEKLESEMNP DHI FVQFSDDENADKPDALKDLEKNPIWKS LKAVKED  
HVYVNSVDPLAQGGTAWSKVRFLKAAA EKLTON

**FeuB (38.32 %)**

MYSKQWTRIIILITSPFAIALSLLLSILYGAKHLSTDIVFTSLIHFDPGNTDHQIIWHSRI PRAAGALLIGA  
ALAVSGALMQGITRNYLASPSIMGVSDGSAFIITLCMVLLPQSSSIEMMIYSFIGSALGAVLVFGLAAMMP  
NGFTPVQLAII GTVTSMLLSSL SAAMSIYFQISQDLSFWYSARLHQMSPDFLKLAA PFFLIGIIM AISLSK  
KVTAVSLGDDISKSLGQKKTIKIMAMLSVII LTGSAVALAGKIAFVGLVVP HITRFLVGS DYSRLIPCSC  
ILGGIFLTLCDLASRFINYPFETPIEVVTSIIIGV PFFLYLIKRRKGGEQNG

**PbpC (56.14 %)**

MLKCCILLVFLCVGLIGLIGCSKTDS PEDRMEAFVKQWNDQQFDDMYQSLTKDVKKEISKKDFVNRYKAIY  
EQAGVKNLKV TAGEVDKDDQDNKTMKHI PYKVSMTNAGKVSFKNTAVLKLEKTDDEESWNIDWDPSFI FK  
QLADDKTVQIMSI EPKRQIYDKNGKGLAVNTDVPEIGIVPGELGDKKEKVIKELAKKLDLTEDDIKKKLD  
QGWVKDDSFVPLKKVVPDQEKLVSEATSLQGVTRTNVSSRYYPYGEKTAHLTG YVRAITAEELKKKKEGTY  
SDTSNIGIAGLENYEDKLRGTTGWKIYVPQTGEVIAEKKAKDGEDLH LTI DIKTQMKLYDELKDDSGAAV  
ALQPKTGETLALVSAPSYDPNGFI FGWSDKEWKKLNKDKNNPFSAKFNKTYAPGSTIKPIAAAIGIKNGTL  
KADEKTIK GKWEQKDS SWGGYSVTRV SERLQOVDLENALITSDNIYFAQNALDMGADTF TKGLKTFGFSE  
DVPYEFPIQKSS IANDKLDSDILLADTGYGQGMQMSPLHLATAYT PFDVNGDLVKPTLIK KDSQTADVWH  
KQVVTKEGAADITKGLKGVVEDE RGSAYQP VVKGITVAGKTGTAE LKTSKDDKDGTENGWFVGYDYENKDL  
LVAMMIQNVQDRGGSHYVVEKAKKQFQSN

**DacA (63.66 %)**

MNIKKCKQLLMSLVVLT LAVTCLAPMSKAKAASDPIDINASAAIMIEASSGKILYSKNADKRLPIASMTKM  
MTEYLLLEAIDQGVKWDQTYTPDDYVYEISQDNLSNVPLRKDGKYTVKELYQATAIYSANAAAIAIAEI  
VAGSETKFVEKMNAKAKELGLTDYKFNATGLENKDLHGHP EGTSVNEESEVSAKDMAVLADHLITDYPE  
ILETSSIAKTKFREGT DDEMMPNWNFMLKGLVSEYKATVDGLKTGSTD SAGSCFTGTAERNGMRVITVV  
LNAKGNLHTGRFDETKKMF DYAFDNFSMKEIYAEGDQVKGHKTISVDKGKEKEVGIVTNKAFSLPVKNGEE  
KNYKAKVTLNKDNL TAPVKKGT KVGKLTAEYTGDEKDYGFLNSDLAGVDLVTKENVEKANWFLTMRSIGG  
FFAGIWGSIVDVTVTGW F

**DacC (26.27 %)**

MKKS IKLYVAVLLL FVVASVPYMHQAALAAEKQDALSGQIDKILADHPALEGAMAGITVRS AETGAVLYEH  
SGDTRMRPASSLKL LTA AAASVLGENYSFTTEVRTDGLTKGKLNGLNYLKGKGDPTLLPSDFDKMAEIL  
KHSGVKVIKGNLIGDDTWHDDMRLSPDMPWSDEYTYYGAPI SALTASPNEDYDAGTVIVEVTPNQKEGEEP  
AVSVSPKTDYITIKNDAKTTAAGSEKDLTIEREHGTNTITIEGSVPVDANKTKEWISVWEPAGYALDLFKQ  
SLKKQGITVKGDIKTGEAPSSSDVLLSHRSMPLSKL FVPFMKLSNNGHAEVLVKEMGKVKKGE GSWEGLE  
VLNSTLPEFGVDSKSLVLRDGS GISHIDAVSSDQLS QLLYDIQDQSWFSAYLNSLPVAGNPRDMVGGTLRN  
RMKGT PAQGVRAKTGSLSTVSSLSGYAETKSGKLVFSILLNGLI DEEDGKDIEDQIAVILANQ

**YxeB (60.19 %)**

MKKNILLVGMVLVLLLMFVSACSGTASKGSSSDSASEKTEMRTYKSPKGNVNI PAHPKRIVTDFYAGELLSV  
GANVVGSGSWSFDNPF LKSKLKNVKDVGDPI SVEKVMELQPD LIVVMNEENVDKLKKIAPT VVI PYNTAKN  
VEDTVSMFGDIAGAKDQAKSFMADFNKKA EAAK KKIAGVIDKDATFGIYENTDKGEFWVFN DNGGRGGQAV  
YNALGLKAPEKIEQDV IKKGEMKQLSQEVIPEYAADYMFITDYNPKGESKTLDKLENS SIWKNLDAVKHNR  
VFINDFDSFYYPDPI SVSKQVDIITDMLIKRAEEN

**YwjA (36.17 %)**

MLRQFFSYYPKYKTLFFLDFFSAIAGGLMELSFPLIVNYFIDTLLPGRDWGLIIATSIGLFAVYALSSALQ  
YIVTYWGHMLGINIETDMRKSFLDHLQKLSFKFYDNNKTGTLMSKLTNDLMIYIGEVAAHGPEDLFIAMVTI  
LGAFGVMLFINWQLALLTFIIMPVIVLWALYFNKKMTKAFTTLNKDIGDFSARVENNIGGIRLVQAFGNEA  
FEKERFAVNNQRFVTKLSSYKIMAKNGSISYMLTRFVTLFVLLCGTWFVIRGSLSYGEFVAFVLLTNVLF  
RPIDKINAIIEYMPRGIAGFKSYMELMETEPDIQDSDPKDVSGLKGNIRYKHVSFGYDDHNVLNDINLS  
IQAGETVAFVGPSPGAGKSTLCSLLPRFYEAASEGDITIDGISIKDMTSSLRGQIGVVQQDVFLFSGLTREN  
IAYGRLGASEEDIWQAVKQAHLEELVHNMPDGLDTMIGERGVKLSGGQKQRLSIARMFLKNPSILILDEAT  
SALDTETEAAIQKALQELSEGRTTLVIAHRLATIKDADRIVVVVTNNGIEEQGRHQDLIEAGGLYSRLHQAQ  
FGQMVHR

**YknZ (8.8 %)**

MSLLENIRMALSSVLAHKMRSILTMLGIIIGVGSVIVVVAVGQGGEQMLKQSIGPGNTVELYMPDSDEEL  
ASNPNAAESTFTENDIKGLKGIIEGKQVVASTSESMKARYHEEETDATVNGINDGYMNVNSLKIIESGRTF  
TDNDFLAGNRVGIISQKMAKELFDKTSPLGEVWINGQPVEIIGVLKKTGLLSFDLSEMYVFPNMMKSSF  
GTSDFSNVSLLQVESADDIKSAGKEAAQLVNDNHGTEDSYQVMNMEEIAAGIGKVTAIMTTIIGSIAGISLL  
VGGIGVMNIMLVSVTERTREIGIRKSLGATRQIILTQFLIESVVLTLIGGLVIGIGYGGAALVSAIAGWP  
SLISWQVVCVGLFVSMIGVIFGMLPANKAAKLDPIEALRYE

**YwbM (78.7 %)**

MNFTKIAVSAGCILALCAGCGANDTSSSTKEKASSEKSGVTKEITASVNMETIISKLNDSVEKGDQKEIEK  
KGKELNSYWLSFENDIRSDYPFEYTEIEKHLQPIYTEAQKDKPDAGKIKTESESLKASLEDLTEAKKSGKK  
ASDQLAKAADEYKGYVKEQSDQLVKATEAFTGAVKSGDIEKSKTLYAKARVYERIEPIAESLGDLDPKID  
ARENDVEEGDKWTGFHKLEKAIWKDQDISGEKATADQLLKDVKELDGSIQSLKLTPEQIVAGAMELLNEAG  
ISKITGEEERYSRIDLVDLMAVNEGSEAVYQTVKSALVKDHSDLTEKLDTEFSEFEVLMAKYKTNDSYTS  
YDKLSEKQIRELSTKLTTLSETMSKIANVL

**YcdA (75.99 %)**

MFQKKTYAVFLILLMMFTAACSGSKTSAEKKESETEKSSDIAQVKIKDVSYTLPSKYDKSTSDDQLVLKV  
NVAVKNTGKDLNVDSMDFTLYQGDTKMSDTPEDYSEKLOGSTINADKSVEGNLFFVVDKKGQYELNYTP  
ESYGDKKPKSVTFKIDGKDKKILATADKLQDSAKALSAYVDVLLFGKDNADFEKITGANKNEIVNDFNESA  
KDGYLSASGLSSTYADSKALDNIVNGIKEGLSKNSSIQAKTTSISKDEAIVEATVKPVDASSLSDRIEDKV  
KDYYSKNSSASYEEAVKYALQVYPEEFKKGLPASSEKTVEVKMKKNDIDQWQLDMDDYRAAELVEAFIKE

**YerH (55.05 %)**

MKKTALALAATAAVLMLSACSSGFGEKEEEEITQKTAKSSEKAIIVPKYNI SDSYYKMVLPFKAGKARGLTTE  
QLNTRLDIDEFETGLMRLAQDSFSTDDYLFQEGQYLEDTEVLSWLARKKTGSDLKKAEEKDKNFKNEGLNP  
ALPSSGSTEEKNESSPIYLASMLEHDYLVKDKNSIQLGGVMIGLALNSVYYYREKTGDPQKEVEIKDSTL  
RQQGEKIAQEVINRLRKKDNLKNVPIVVALYKQASKTIVPGNFIKTEVKAGSTDISNWDINEKYVFYP  
ADTTTAEKYPDDTEVFKRFKNSIEEYFPNYTGVVGTALYENDEMKKMKIDIPMQFYGKSEVVAFTQFLTGE  
VMDYYSKSSVDVEVNITSSDGQEAVIIRNAGDKPTVHIYD

**YufN (77.14 %)**

MSLVIAAGTILGACGNSEKSSSGSEGKKNKFSVAMVTDVGGVDDKSFNQSAWEGIQAFGKENGLKKGKNGYD  
YLQSKSDADYTTNLNKLARENFDLIYGVGYLMEDSISEIADQRKNTNFAIIDAVVDKDNVASITFKEQEGS  
FLVGVAAALSSKSGKIGFVGGMESELIKKEVGFVFRAGVQAVNPKAVVEVKYAGGFADVGKATAESMYKS  
GVDVIYHSAGATGTGVFTEAKNLKKEPKRDRVWVIGVDKDKQYAEQVEGTDDNVTLTSMVKKVDTVVEDVT  
KKASDGKFPGETLTYGLDQDGVGISPSKQNLSDDVIAKAVDKWKKKIIDGLEIPATEKELKTFKAE

**AdcA (45.14 %)**

MFKKWSGLFVIAACFLLVAACGNSSTKGSADSKGDKLHVVTTFYPMYFTKQIVKDKGDVDLLIPSSVEPH  
DWEPTPKDIANIQDADLFVYNSEYMETWVPSAEKSMGQGHAVFVNASKGIDLMEGSEEEHEEHDHGEHEHS  
HAMPHVWLSPLVAQKEVKNITAQIVKQDPDNKEYYEKNSKEYIAKLQDLKLYRTTAKKAEKKEFITQHT  
AFGYLAKEYGLKQVPIAGLSPDQEPSAASLAKLKYAKEHNVKVIYFEEIASSKVADTLASEIGAKTEVLN  
TLEGLSKEEQDKGLGYIDIMKQNLDAKDSLLVKS

**BdbD (74.32 %)**

MKKKQSSAKFAVILTVVVVLLAAIVI INNKTEQGNDAVSGQPS IKGQPVLGKDDAPVTVVEFGDYKPCS  
CKVFNSDIFPKIQKDFIDKGDVKFSFVNVMFHGKGSRLAALASEEVWKEDPDSFWDFHEKLFKQPDTEQE  
WVTPGLLDLAKSTTKIKPETLKENLDKETFASQVEKSDLNQKMNIQATPTIYVNDKVIKNFADYDEIKE  
TIEKELKGG

**Qox2 (53.27 %)**

MIFLFRALKPLLVLALLTVVFLVGGCSNASVLDPKGPVAEQSDLILLSIGFMLFIVGVVFLFTIILVKY  
RDRKGGKDNQSYNPEIHGNTFLEVVTVIPILIVIALSVPTVQTIYSLEKAPEATKDKEPLVYATSVDWKW  
VFSYPEQDIETVNYLNI PVDRPILCKISSADSMASLWIPQLGGQKYAMAGMLMDQYLOADKVGTYEGRNAN  
FTGEHFADQEFVNAVTEKDFNSWVKKTQNEAPKLTKEKYDELMLPENVDELTFSSSTHLKYVDHGQDAEYA  
MEARKRLGYQAVSPHCKTDPFENVKKNFEKKSDDTEE

**YxeM (50.38 %)**

MKMKKWTVLVVAALLAVLSACGNNGNSSKEDDNLVHGATGQSYPFAYKENGKLTGFVMEVMEAVAKKIDM  
KLDWKLLFESGLMGELQTKLDTISNQVAVTDERKETYNFTKPYAYAGTQIVVKKDNTDIKSVDDLKGTKV  
AAVLGSNHAKNLESKDPDKKINIKTYETQEGTLKDVAYGRVDAYVNSRTVLI AQIKKTGLPLKLAGDP IVY  
EQVAFPFKDDAHDKLRKKVKNALDELKDGTLKKLSEKYFNEDITVEQKH

**RbsB (29.51 %)**

MKKAHSVILTSLFLLTACSLLEPPQWAKPSNSGNKKEFTIGLSVSTLNNPFFVSLKKGIEKEAKKRGMKVI  
IVDAQNDSSKQTS DVEDLIQGGVDALLINPTDSSAI STAVESANAVGVPVVTIDRSAEQGVETLVA SDNV  
KGGEMAAAFIADKLGKGAKEAELEGVPGASATREGRSGFHNIADQKLQVVTKQSADFDRTKGLTVMENLLQ  
GHPDIQAVFAHNDEMALGALEAINSSGKDILVIGFDGNKDALASIKDRKLSATVAQQPELIGKLATEAAD  
ILHGKVKQKTI SAPLKLETQK

**YkwC (89.24 %)**

MKKTIGFIGLGMGKSMASHILNDGHPVLVYTRTKEKAESILQKGAIWKDVTVDLSKEADVITMVGYPST  
VEEVYFGSNGI IENAKEGAYLIDMTTSKPSLAKKIAEAAKEKALFALDAPVSGGDI GAQNGTLAIMVGGEK  
EAFEACMPI FSLMGENIQYQGPAGSGQHTKMCNQIAIAAGMIGVAEAMAYAQKSGLEPENVLKSI TTGAAG  
SWSLSNLAPRMLQGNFEPGFYVKHF IKDMGIALEEAELMGEEMPGLSLAKSLYDKLAAQGEENSGTQSIYK  
LWVK

**YeeF (21.04 %)**

MKVFEAKTLLSEATDRAKEYKELRTQMVNLRKALKGVADLSDSEFSGKGASNIKAFYTTNVGVADRWIDYI  
DMKIAFFNSIAGAAEDKGLSDAYIEESFLEHELANANKKSKSIMSEQKKAMKDILNDIDDILPLDLFSTET  
FKDELADANDKRKKTLEKLDALDEDLKTEYALSEPNEQFIKSDFQKLQEATGKGKNATPIHYNAYRES  
IHKRRHLKRRTEAYLKI KKEEAKEREIEKLERLKNYDYADAEFYEMAKTIGYENLTAEQORYFTQIEN  
TRELEAGFKGVAVGLYDSGKDAVGLWDMVTDPGGTVEAITGAMAHPKTYEASAAIEESYQKDMVNGDT  
YSRARVWSYAVGTVVTSIVGTKGVGAVSKTGTAAKVTTKVKTAASKSATAQKAITVSKQTVDH IKQKVNTG  
IEVSKKHVKT KLNQIGDLTLADILPYHPRHDLVPAGVPYNAVNGVTLKEGLQKFAKVI LPKPYGTSSSGRR  
TPAPHVPPVTVKYGEHFARWSRKKVLKPNIIYKTKEGYTYTTDNYGRITSVKADLQLGEAKRNQYAQTNAG  
KPQDRKPDGDDGHLIATQFKGSGQFDNIVPMNSQINRSGGKWEYEMEQEWAKALS KKPVKVAVQIEPVYSG  
DSL RPSYFDVTYKIGSRKEISVSIKISLGVRMETRKMQDLYQLIGEKLNDIIPGEWTKIYLYAEVLDDST  
MVLFHFRT PENNQIIYSQDIPSHYNVSKDIFKTLRELRELFEELRTEHRNNNDVWNTLTLTLDRSGEFQ  
LDYNYDDILASELDGYERIAIWEYKNLGILPEDEDDKEFVISYLGL

**YpuA (36.21 %)**

MKKIWI GMLAAAVLLMVPKVS LADA AVGDVIVTLGADLSESDKQKVLDEMNVDPNATTVTVTNKEEHEYL  
GKYISNAQIGSRAISSSSITIAKKGSLNVETHNISGITDEMYLNLALMTAGVKDAKVYVTPAFEVSGTAAL  
TGLIKAYEVSSDEAISEDVKQVANQELVTTSELGDKIGNENAAALIAKIKKEEFAKNGVDPNKADIEKQVDD  
AASDLNVTLTDSQKNQLVSLFNKMKNADIDWGQVSDQLDKAKDKITKFI ESDEGKNFIQKVIDFFVSIWNA  
IVSIFK

**Table S2: Strain list.**

| Strain                          | Genotype                                                                                  | Reference                        |
|---------------------------------|-------------------------------------------------------------------------------------------|----------------------------------|
| <b><i>Bacillus subtilis</i></b> |                                                                                           |                                  |
| DL1                             | Wild type (NCIB3610)                                                                      | (Branda <i>et al.</i> , 2001)    |
| DL2                             | Wild type 168                                                                             | (Moszer <i>et al.</i> , 2002)    |
| DL7                             | $\Delta eps::tet \Delta tasA::km$                                                         | (Lopez <i>et al.</i> , 2009c)    |
| DL1308                          | $\Delta ftsH::km$                                                                         | This study                       |
| DL1315                          | $\Delta ftsH::tet$                                                                        | (Zellmeier <i>et al.</i> , 2003) |
| DL1211                          | $\Delta floT::km$                                                                         | (Lopez & Kolter, 2010)           |
| DL1442                          | $\Delta floT::spc$                                                                        | This study                       |
| DL1401                          | $\Delta yqfA::mls$                                                                        | (Lopez & Kolter, 2010)           |
| JS119                           | $\Delta floT$ (markerless)                                                                | This study                       |
| JS152                           | $\Delta yqfA$ (markerless)                                                                | This study                       |
| AY93                            | $\Delta floT::spc, \Delta yqfA::mls$                                                      | This study                       |
| DL1419                          | $\Delta floT::km \Delta yqfA::mls$                                                        | This study                       |
| JS163                           | $\Delta floT \Delta yqfA$ (markerless)                                                    | This study                       |
| BM59                            | $amyE::P_{hp-floT} (spc) lacA::P_{hp-yqfA} (mls)$                                         | This study                       |
| BM28                            | $amyE::P_{hp-floT} (spc)$                                                                 | This study                       |
| BM26                            | $lacA::P_{hp-yqfA} (mls)$                                                                 | This study                       |
| DL147                           | $\Delta kinC::km$                                                                         | (Lopez <i>et al.</i> , 2009a)    |
| DL227                           | $\Delta kinC::mls$                                                                        | (Lopez <i>et al.</i> , 2009a)    |
| DL1295                          | $amyE::FloT-YFP (spc)$                                                                    | (Lopez & Kolter, 2010)           |
| DL1367                          | $amyE::YqfA-GFP (spc)$                                                                    | This study                       |
| AY224                           | $lacA::P_{hp-FtsH-RFP} (mls)$                                                             | This study                       |
| AY225                           | $lacA::P_{ftsH-FtsH-RFP} (mls)$                                                           |                                  |
| DL1565                          | $\Delta floT \Delta yqfA$ (markerless) $lacA::FtsH-RFP (mls)$                             | This study                       |
| AY238                           | $amyE::YqfA-GFP (spc) lacA::FtsH-RFP (mls)$                                               | This study                       |
| AY240                           | $amyE::FloT-YFP (spc) lacA::FtsH-RFP (mls)$                                               | (Lopez & Kolter, 2010)           |
| DL1056                          | $lacA::P_{hag-cfp} (mls)$                                                                 | (Vlamakis <i>et al.</i> , 2008)  |
| DL382                           | $amyE::P_{tapA-yfp} (spc)$                                                                | (Vlamakis <i>et al.</i> , 2008)  |
| DL1089                          | $amyE::P_{sspB-yfp} (spc)$                                                                | (Vlamakis <i>et al.</i> , 2008)  |
| DL1079                          | $amyE::P_{tapA-yfp} (spc) lacA::P_{hag-cfp} (mls)$                                        | (Vlamakis <i>et al.</i> , 2008)  |
| DL1521                          | $\Delta ftsH::km amyE::P_{tapA-yfp} (spc) lacA::P_{hag-cfp} (mls)$                        | This study                       |
| DL1523                          | $\Delta ftsH::km amyE::P_{hp-ftsH} (spc) thrC::P_{tapA-yfp} (cm) lacA::P_{hag-cfp} (mls)$ | This study                       |
| DL1433                          | $\Delta ftsH::km amyE::P_{ftsH-ftsH} (spc)$                                               | This study                       |
| DL1361                          | $\Delta ftsH::km amyE::P_{hp-ftsH} (spc)$                                                 | This study                       |
| DL1568                          | $\Delta ftsH::km amyE::P_{hp-FtsH-RFP} (spc)$                                             | This study                       |
| DL1349                          | $\Delta ftsH::km amyE::P_{hp-ftsH} (spc)$                                                 | This study                       |
| DL1404                          | $\Delta ftsH::km amyE::P_{hp-FtsH-RFP} (spc)$                                             | This study                       |
| DL1461                          | $\Delta ftsH::km amyE::P_{hp-ftsH} (spc) lacA::P_{tapA-yfp} (mls)$                        | This study                       |
| DL1364                          | $\Delta ftsH::km amyE::P_{hp-ftsH} (spc) lacA::P_{sspB-yfp} (mls)$                        | This study                       |
| DL383                           | $\Delta abrB::km$                                                                         | (Chu <i>et al.</i> , 2008)       |
| DL5                             | $\Delta sinR::spc$                                                                        | (Branda <i>et al.</i> , 2006)    |
| DL1148                          | $amyE::sad67 (cm)$                                                                        | (Ireton <i>et al.</i> , 1993)    |
| DL1362                          | $\Delta ftsH::tet \Delta abrB::km$                                                        | This study                       |
| DL1360                          | $\Delta ftsH::km \Delta sinR::spc$                                                        | This study                       |
| DL1363                          | $\Delta ftsH::km amyE::sad67 (cm)$                                                        | This study                       |
| DL1372                          | $\Delta floT::spc \Delta yqfA::mls \Delta abrB::km$                                       | This study                       |
| DL1374                          | $\Delta floT::km \Delta yqfA::mls \Delta sinR::spc$                                       | This study                       |

|                                        |                                                                                                              |                                |
|----------------------------------------|--------------------------------------------------------------------------------------------------------------|--------------------------------|
| DL1375                                 | $\Delta floT::spc \Delta yqfA::mIs amyE::sad67 (cm)$                                                         | This study                     |
| DL1365                                 | $\Delta floT::km \Delta yqfA::mIs, amyE::sad67 (cm)$                                                         | This study                     |
| DL1430                                 | $\Delta rapA::cm \Delta rapB::spc \Delta rapE::mIs \Delta spo0E::km$                                         | This study                     |
| DL1554                                 | $\Delta floT \Delta yqfA$ (markerless) $\Delta rapA::cm \Delta rapB::spc, \Delta rapE::mIs \Delta spo0E::km$ | This study                     |
| JS201                                  | $\Delta yuaG$ (markerless) $amyE::P_{hp}\text{-FloT-His}^6 (spc)$                                            | This study                     |
| JS202                                  | $\Delta yqfA$ (markerless) $amyE::P_{hp}\text{-YqfA-His}^6 (spc)$                                            | This study                     |
| <b>Other species used in this work</b> |                                                                                                              |                                |
| DL1128                                 | <i>Staphylococcus aureus</i> wild type SC-01                                                                 | (Beenken <i>et al.</i> , 2003) |
| DL95                                   | <i>Escherichia coli</i> DH5 $\alpha$                                                                         | (Reusch <i>et al.</i> , 1986)  |
| DL127                                  | <i>Escherichia coli</i> DH5 $\alpha$ pBR322 P <sub>c</sub> -gfp                                              | This study                     |
| JC163                                  | <i>Escherichia coli</i> DH5 $\alpha$ pBR322 P <sub>c</sub> -rfp                                              | This study                     |
| DL1205                                 | <i>Pseudomonas aeruginosa</i> PA14                                                                           | (O'Toole & Kolter, 1998)       |

## **Abbreviations**

### Antibiotics

|            |                                                      |
|------------|------------------------------------------------------|
| <i>mIs</i> | Encodes erythromycin + lincomycin resistance protein |
| <i>km</i>  | Encodes kanamycin resistance protein                 |
| <i>cm</i>  | Encodes chloramphenicol resistance protein           |
| <i>tet</i> | Encodes tetracycline resistance protein              |
| <i>spc</i> | Encodes spectinomycin resistance protein             |

### Protein tags

|                  |                            |
|------------------|----------------------------|
| GFP              | Green fluorescent protein  |
| YFP              | Yellow fluorescent protein |
| RFP              | Red fluorescent protein    |
| His <sup>6</sup> | Six histidines             |

### Promoters

|                   |                                                              |
|-------------------|--------------------------------------------------------------|
| P <sub>hp</sub>   | Hyperspank IPTG-inducible promoter                           |
| P <sub>c</sub>    | Constitutive promoter                                        |
| P <sub>ftsH</sub> | Natural promoter that controls the expression of <i>ftsH</i> |
| P <sub>tasA</sub> | Natural promoter that controls the expression of <i>tasA</i> |
| P <sub>sspB</sub> | Natural promoter that controls the expression of <i>sspB</i> |
| P <sub>hag</sub>  | Natural promoter that controls the expression of <i>hag</i>  |

**Table S3: Primer list.**

| Name      | Sequence (5'-3')                                           | Purpose                       |
|-----------|------------------------------------------------------------|-------------------------------|
| AY84B     | ATGGTGAGCAAGGGCGAGGAGG                                     | Forward RFP                   |
| AY85B     | TTTTTTGCTAGCTTACTTGTACAGCTCG                               | Reverse RFP                   |
| AY82      | TTTTTTGTCGACATGGTACTATTGAACATAGTTGTG                       | Forward FtsH                  |
| AY83B     | ATCCTCCTCGCCCTTGCTCACCATCTCTTTCGTATCGTCTTTC                | RFP tail                      |
| AY132     | TGCTAAGCTTACATAAGGAGGAACACTACTATGACAATGCCGATTAT            | Forward FloT                  |
| AY133     | ATCCTCCTCGCCCTTGCTCACCATCTCTGATTTTTGGATCGTTT               | Reverse FloT (LFH) RFP        |
| AY134     | TTTTTGGATCCTTACTTGTACAGCTCGTCCAT                           | Reverse RFP (BamH1)           |
| Ftshfwsal | AAAAGTCGACATGGTACTATTGAACATAGTTGT                          | Forward IPTG-controlled FtsH  |
| Ftshrvsph | AAAAGCATGCTGATTGTAAGGCCGAGC                                | Reverse IPTG-controlled FtsH  |
| Pfshfw    | TTTTGAATCAACGAGCGAGTATCAAGATACA                            | Forward Promoter <i>ftsH</i>  |
| Pfshrv    | TTTTAAGCTTTCCTTACCTCCTCCCACAGT                             | Reverse Promoter <i>ftsH</i>  |
| Ftsh1     | CAGCGACCGCATTGTATT                                         | $\Delta$ <i>ftsH</i> cassette |
| Ftshkm2   | CCTATCACCTCAAATGGTTCGCTGCCGATCAGCTTTCATAA                  | $\Delta$ <i>ftsH</i> cassette |
| Ftshket2  | GAGAACAACCTGCACCATTGCAAGATGCCGATCAGCTTTCATAA               | $\Delta$ <i>ftsH</i> cassette |
| Ftshkm3   | CGAGCGCCTACGAGGAATTTGTATGCTGCCAAGAGAAGACCGTT               | $\Delta$ <i>ftsH</i> cassette |
| Ftshket3  | GGGATCAACTTTGGGAGAGAGTTCTATGCTGCCAAGAGAAGACCG<br>TT        | $\Delta$ <i>ftsH</i> cassette |
| Ftsh4     | AGCTTTGCTGCACGCGA                                          | $\Delta$ <i>ftsH</i> cassette |
| AY86      | ATTTGCAGCATATCATGGCGTG                                     | $\Delta$ <i>pbpE</i> cassette |
| AY87      | CTTGATAATAAGGGTAACTATTGCCCTCCACCTCCCATATCTCTG              | $\Delta$ <i>pbpE</i> cassette |
| AY88      | GGGTAAC TAGCCCTCGCCGGTCCACGAAAGGAATGAATGAATTTG<br>ATGATCGG | $\Delta$ <i>pbpE</i> cassette |
| AY89      | AGCTTTGATAAGCAAGATATGTG                                    | $\Delta$ <i>pbpE</i> cassette |
| JS15      | TTTTGGATCCCCATTTSTAAAGCACTTCAAATGG                         | Flotfw1                       |
| JS16      | AGTTACCATACGGTCTGCCCAAATTCCTCCTTTTTATGTAAA<br>ATG          | Flotrv2                       |
| JS17      | GGGCAGAACCGTATGGTAACTG                                     | Flotfw3                       |
| JS18      | TTTTGTCGACCTTTAACTTATAATGCGACTTAC                          | Flotrv4                       |
| JS19      | TTTTGGATCCCCAGATCAGCTATGCAAAGGAG                           | Yqfafw1                       |
| JS21      | GCGTTCTCCCTTCTTAGAGAGGTTGACGGACCCATATAACTTC                | Yqfarv2                       |
| JS22      | CTCTCTAAGAAGGGAGAACGC                                      | Yqfafw3                       |
| JS39      | TTTTGTCGACCAGATATGATGCAGTGGCCCTG                           | Yqfarv4                       |
| BM5       | AAAAGTCGACTAAGGAGGAACACTACTATGACAATGCCGATTATAAT            | Forward IPTG-controlled FloT  |
| BM6       | AAAAGCATGCTTACTCTGATTTTTGGATCG                             | Reverse IPTG-controlled FloT  |
| BM7       | AAAAGTCGACTAAGGAGGAACACTACTATGGATCCGTCAACACTTA             | Forward IPTG-controlled YqfA  |
| BM8       | AAAAGCATGCTTATGATTTGCGGTCTTCAT                             | Reverse IPTG-controlled YqfA  |
| JS44      | AAAAGCATGCTTAGTGATGATGATGATGGCTGCTCTCTGATTT<br>TTGGATCG    | FloT Reverse (His6)           |
| JS45      | AAAAGCATGCTTAGTGATGATGATGATGGCTGCTTGAATTTGCG<br>GTCTTCAT   | YqfA Reverse (His6)           |

## Reference list

- Beenken, K. E., J. S. Blevins & M. S. Smeltzer, (2003) Mutation of sarA in *Staphylococcus aureus* limits biofilm formation. *Infect Immun* **71**: 4206-4211.
- Branda, S. S., F. Chu, D. B. Kearns, R. Losick & R. Kolter, (2006) A major protein component of the *Bacillus subtilis* biofilm matrix. *Mol Microbiol* **59**: 1229-1238.
- Branda, S. S., J. E. Gonzalez-Pastor, S. Ben-Yehuda, R. Losick & R. Kolter, (2001) Fruiting body formation by *Bacillus subtilis*. *Proc Natl Acad Sci U S A* **98**: 11621-11626.
- Chu, F., D. B. Kearns, A. McLoon, Y. Chai, R. Kolter & R. Losick, (2008) A novel regulatory protein governing biofilm formation in *Bacillus subtilis*. *Mol Microbiol* **68**: 1117-1127.
- Ireton, K., D. Z. Rudner, K. J. Siranosian & A. D. Grossman, (1993) Integration of multiple developmental signals in *Bacillus subtilis* through the Spo0A transcription factor. *Genes Dev* **7**: 283-294.
- Lopez, D., M. A. Fischbach, F. Chu, R. Losick & R. Kolter, (2009a) Structurally diverse natural products that cause potassium leakage trigger multicellularity in *Bacillus subtilis*. *Proc Natl Acad Sci U S A* **106**: 280-285.
- Lopez, D. & R. Kolter, (2010) Functional microdomains in bacterial membranes. *Genes Dev* **24**: 1893-1902.
- Lopez, D., H. Vlamakis, R. Losick & R. Kolter, (2009b) Cannibalism enhances biofilm development in *Bacillus subtilis*. *Mol Microbiol* **74**: 609-618.
- Lopez, D., H. Vlamakis, R. Losick & R. Kolter, (2009c) Paracrine signaling in a bacterium. *Genes Dev* **23**: 1631-1638.
- Moszer, I., L. M. Jones, S. Moreira, C. Fabry & A. Danchin, (2002) SubtiList: the reference database for the *Bacillus subtilis* genome. *Nucleic Acids Res* **30**: 62-65.
- O'Toole, G. A. & R. Kolter, (1998) Flagellar and twitching motility are necessary for *Pseudomonas aeruginosa* biofilm development. *Mol Microbiol* **30**: 295-304.
- Reusch, R. N., T. W. Hiske & H. L. Sadoff, (1986) Poly-beta-hydroxybutyrate membrane structure and its relationship to genetic transformability in *Escherichia coli*. *J Bacteriol* **168**: 553-562.
- Vlamakis, H., C. Aguilar, R. Losick & R. Kolter, (2008) Control of cell fate by the formation of an architecturally complex bacterial community. *Genes Dev* **22**: 945-953.
- Zellmeier, S., U. Zuber, W. Schumann & T. Wiegert, (2003) The absence of FtsH metalloprotease activity causes overexpression of the sigmaW-controlled pbpE gene, resulting in filamentous growth of *Bacillus subtilis*. *J Bacteriol* **185**: 973-982.
